# Supplementary material for: Estrogen and EGFR Pathways Regulate Notch Signaling in Opposing Directions for Multi-Ciliogenesis in the Fallopian Tube
Source: MDPI journal article supplement (doi:10.3390/cells8080933), 2019-08-19
Supplement: s1 [file s1]

## Supplementary Materials

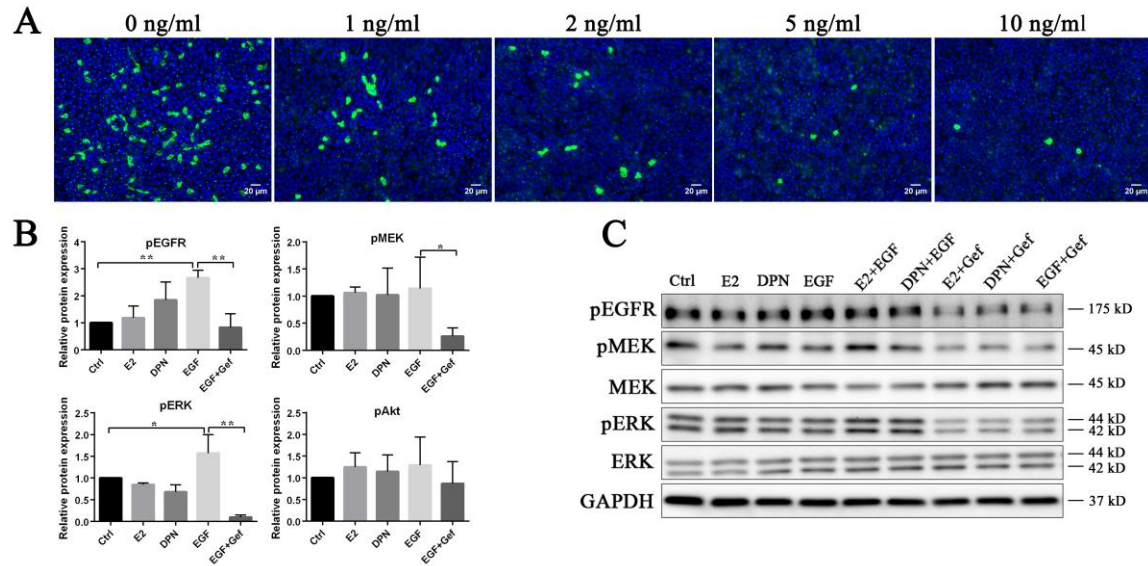

**Figure S1 EGF inhibited ciliogenesis and downregulated phosphorylation of EGFR-MEK-ERK pathway.**

**A.** FTECs were cultured in the presence of E2, followed by the addition of 0-10 ng/ml EGF under ALI culture. Cells on ALI day 15 were stained with ac-tubulin (green) and DAPI (nuclei, blue). Scale bars: 20  $\mu$ m. **B.** Quantification of relative protein expression in figure 3E (ANOVA test,  $n = 3$ ). **C.** Gefitinib inhibited the phosphorylation of EGFR, MEK, and ERK. Western blots of whole-cell lysates from FTECs after treatment with various additives for 24 h. Concentrations for each compound were 2 ng/ml for E2, 100 nM for DPN, 10 ng/ml for EGF, and 500 nM for gefitinib.

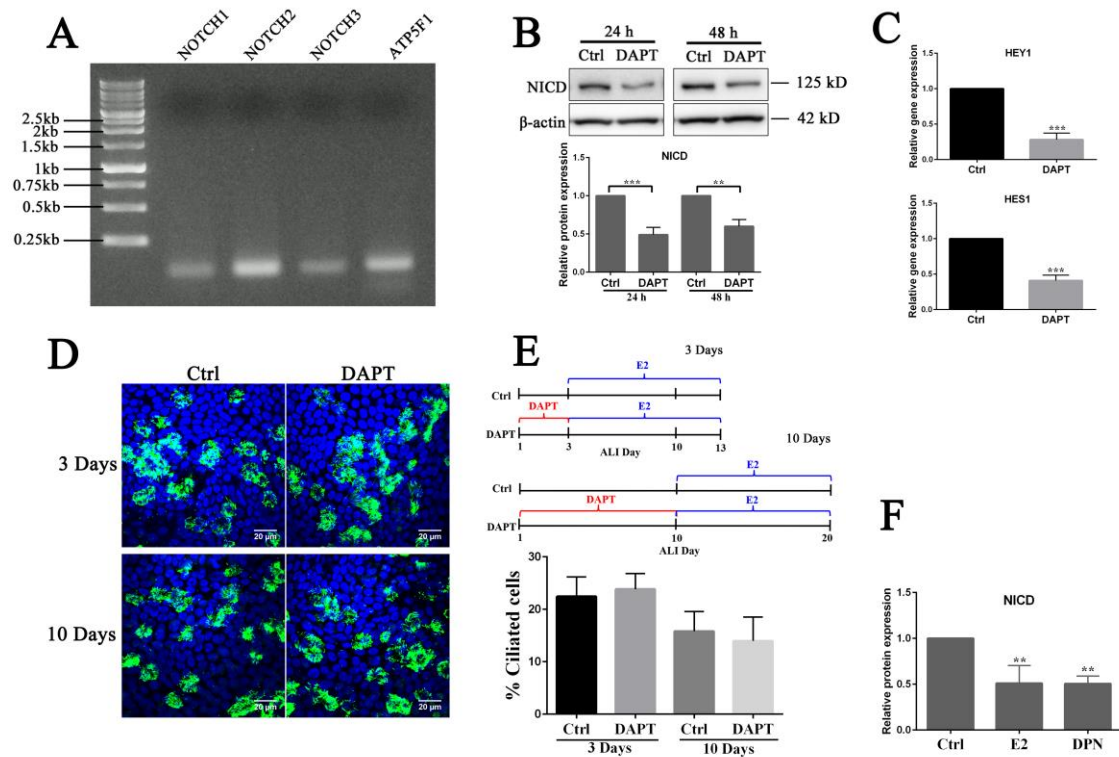

**Figure S2 Effects of DAPT on ciliogenesis.**

**A.** Analysis of NOTCH1, NOTCH2 and NOTCH3 expression in FTECs. ATP5F1 was used as a positive control. **B.** Western blot analysis for NICD expression. Whole cell lysate was prepared from FTECs cultured with or without DAPT (10 μM) in basal medium for 24 and 48 hours. β-actin was used as an internal control (unpaired *t*-test, *n* = 3, compared to the Ctrl group). **C.** qRT-PCR for analysis of HES1 and HEY1 expression in FTECs that were cultured for 24 h with or without DAPT (10 μM) (unpaired *t*-test, *n* = 3, compared to the Ctrl group). **D.** FTECs were pretreated with or without DAPT (10 μM) for either 3 or 10 days, followed by withdrawal of DAPT and addition of 2ng/ml E2 for another 10 days. Cells were stained with anti-ac-tubulin (green) antibody and DAPI (nuclei, blue). Scale bars: 20 μm. **E.** Time course for drug treatment in FTECs culture. Quantification of ac-tubulin positive cells. (unpaired *t*-test, *n* = 7). **F.** Relative protein expression quantified from figure 4G (ANOVA test, *n* = 3, compared to the Ctrl group).

**A**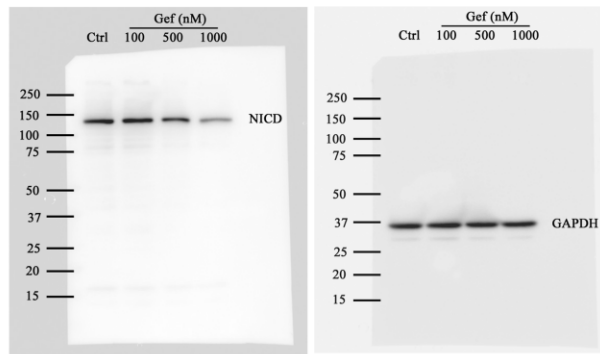**B**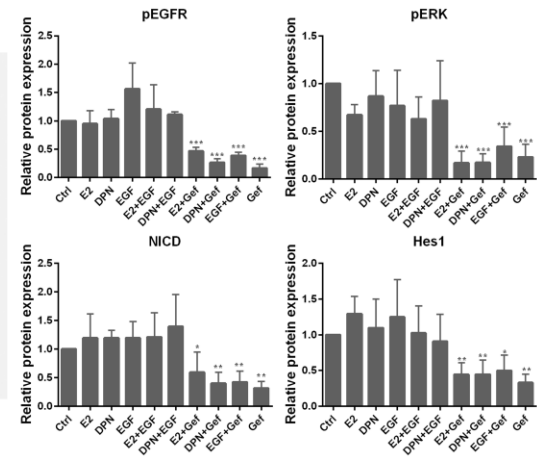

**Figure S3 Characterization of anti-NICD antibody by Western blotting.**

**A.** Full image of PVDF membrane probed with anti-NICD antibody. Whole cell lysate was prepared from FTECs cultured with gefitinib (0-1000 nM) for 4 days. GAPDH was used as an internal control. **B.** Relative protein expression quantified from figure 5F, G (ANOVA test,  $n = 3$ , compared to the Ctrl group).

**Table S1: Antibodies.**

| <b>Name</b>                                | <b>NO.</b> | <b>Company</b> | <b>Country</b>   |
|--------------------------------------------|------------|----------------|------------------|
| mouse anti-acetylated $\alpha$ -tubulin    | 6-11B-1    | Sigma          | Saint Louis, USA |
| mouse anti-GAPDH                           | 60004-1-Ig | Proteintech    | Rosemont, USA    |
| rabbit anti-phospho-EGFR                   | 3777S      | CST            | Danvers, USA     |
| rabbit anti-ERK                            | 9102       | CST            | Danvers, USA     |
| rabbit anti-phospho-ERK                    | 9101S      | CST            | Danvers, USA     |
| rabbit anti-MEK                            | 9122       | CST            | Danvers, USA     |
| rabbit anti-phospho-MEK                    | 9121S      | CST            | Danvers, USA     |
| rabbit anti-Notch1                         | ab52627    | Abcam          | Cambridge, UK    |
| rabbit anti-Hes1                           | GTX108356  | GeneTex        | California, USA  |
| rabbit anti- $\beta$ -actin                | 20536-1-AP | Proteintech    | Danvers, USA     |
| HRP-conjugated anti-mouse IgG              | 7076       | CST            | Danvers, USA     |
| HRP-conjugated anti-rabbit IgG             | 7074       | CST            | Danvers, USA     |
| Alexa Fluor 488 conjugated anti-mouse IgG  | A11029     | Invitrogen     | California, USA  |
| Alexa Fluor 488 conjugated anti-rabbit IgG | A11008     | Invitrogen     | California, USA  |
| Alexa Fluor 568 conjugated anti-mouse IgG  | A11004     | Invitrogen     | California, USA  |
| Alexa Fluor 568 conjugated anti-rabbit IgG | A11036     | Invitrogen     | California, USA  |

**Table S2: Primer sequences**

| Gene name     |           | Sequence                      |
|---------------|-----------|-------------------------------|
| <b>ATP5F1</b> | Sense     | 5'-CACGTGGTGCAGAGCATC-3'      |
|               | Antisense | 5'-TCTTTGCGAGCAGCTTTAGA-3'    |
| <b>DLL1</b>   | Sense     | 5'-GAATGGAGGGAGCTGCAC-3'      |
|               | Antisense | 5'-CACTCACGCAGATCCT-3'        |
| <b>DLL4</b>   | Sense     | 5'-GTGGTGCTGGTGGTACTGTG-3'    |
|               | Antisense | 5'-AGTCCGACAAGTTGTTTCATGG-3'  |
| <b>JAG1</b>   | Sense     | 5'-CTCACAGCTATGCAAACACCA-3'   |
|               | Antisense | 5'-CCTAAGACTGCATCACCATCTG-3'  |
| <b>JAG2</b>   | Sense     | 5'-GCCCAATCCCTGTGTGAA-3'      |
|               | Antisense | 5'-GGTATTGTGCGTGCAGGTT-3'     |
| <b>FOXJ1</b>  | Sense     | 5'-AAACAGACGCTGCCCAAG-3'      |
|               | Antisense | 5'-AAGTTGCCTTTGAGGGGTTC-3'    |
| <b>NOTCH1</b> | Sense     | 5'-TGGATGGCATCAATTCCTTTT-3'   |
|               | Antisense | 5'-CGTCATGCTGGCAGTAGC-3'      |
| <b>NOTCH2</b> | Sense     | 5'-GGAGGTTCCCTGTATCGATGG-3'   |
|               | Antisense | 5'-ACACTTGTCCCCAATGAAGC-3'    |
| <b>NOTCH3</b> | Sense     | 5'-AAGTCCATTTATTCTCTCCATTC-3' |
|               | Antisense | 5'-GATGACCTCTTGGTTGCACTG-3'   |
| <b>NOTCH4</b> | Sense     | 5'-GTGGTGCTGGTGGTACTGTG-3'    |
|               | Antisense | 5'-AGTCCGACAAGTTGTTTCATGG-3'  |
| <b>HEY1</b>   | Sense     | 5'-GCCGTCGAGACCGGATCAATAA-3'  |
|               | Antisense | 5'-GCATTCCCGAAACCCCAAACCTC-3' |
| <b>HES1</b>   | Sense     | 5'-CTAAGCACAGACCCGAGCGT-3'    |
|               | Antisense | 5'-GGTCATGGCGTTGATCTGGG-3'    |
